# Supplementary material
Source: publisher figshare collection journal article supplement (https://aacr.figshare.com/articles/dataset/_/22820350)

## Supplementary Figure 9

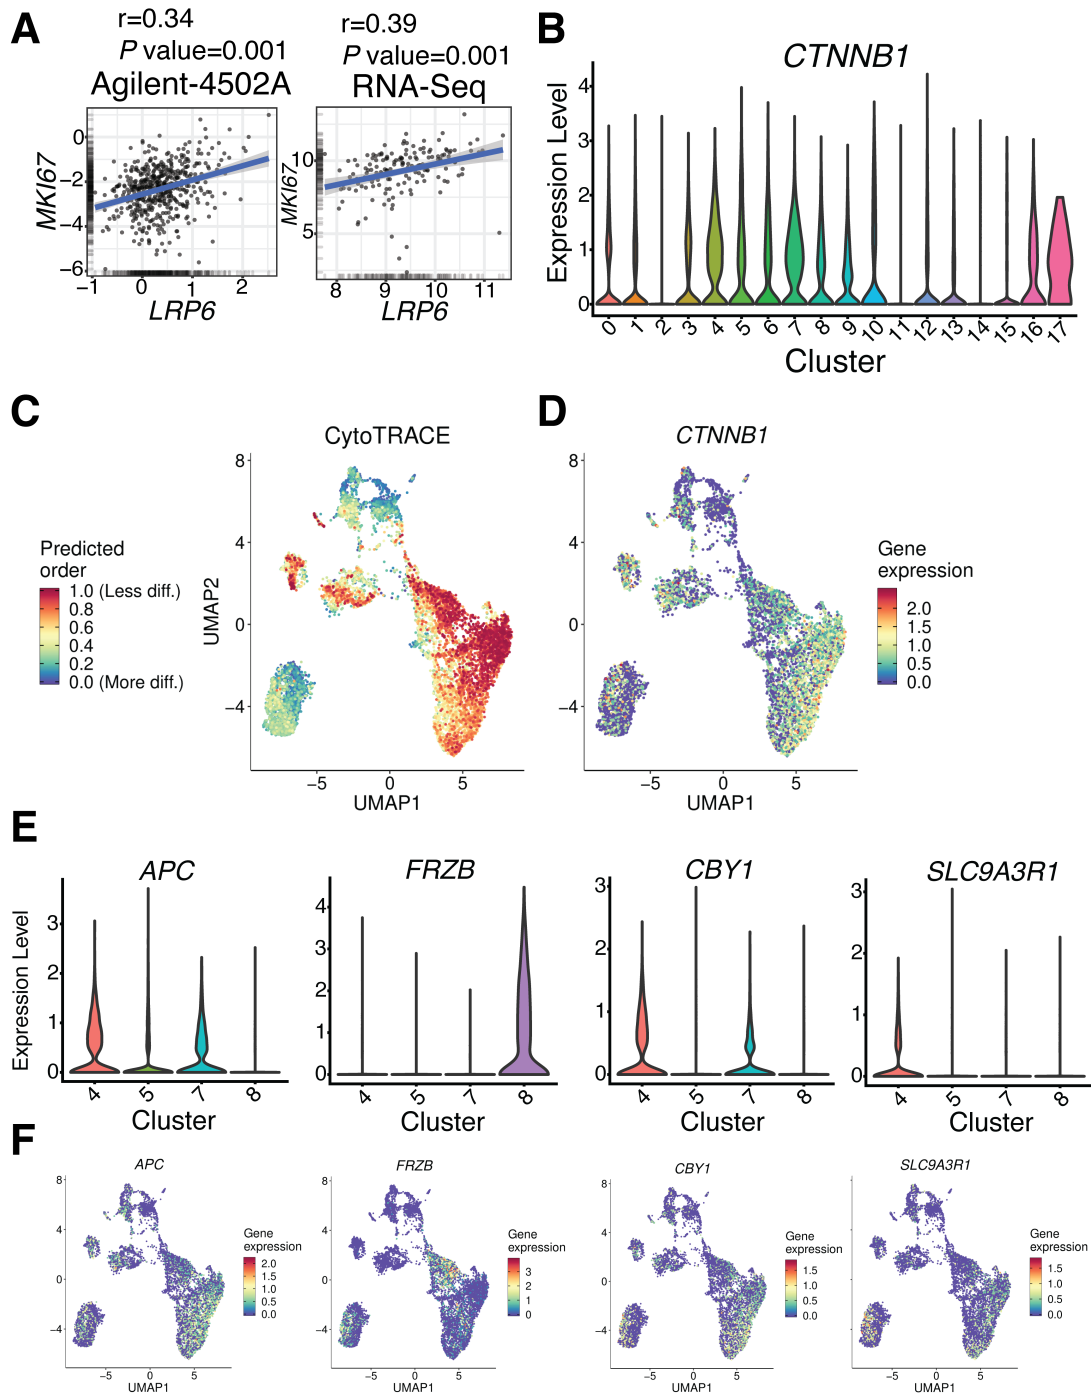

Supplement: Supplementary file 1 [file 40570621]
